# Supplementary material for: Implementation of a Personalized Blood Management Program in Cardiac Surgery: A Single-Center, Retrospective Before-and-After Study
Source: Research Square preprint supplement (doi:10.21203/rs.3.rs-7567325/v1), 2025-12-31
Supplement: Supplementary file 1 [file 59731a0f35d7fac3b197c91b.docx]

**Additional files**

| Antiplatelet therapy | Continuation of Aspirin.  Interruption of P2Y12 inhibitor :   - Ticagrelor and Clopidogrel : D-5 before surgery; - Prasugrel : D-7 before surgery.   Bridging Clopidogrel with Aspirin. |
| --- | --- |
| Oral anticoagulation therapy | Interruption of NOAC :   - Apixaban, Rivaroxaban : D-3 before surgery; - Dabigatran : D-4 (creatinine clearance ≥50mL/min) or D-5 (creatinine clearance <50mL/min) before surgery.   Interruption of VKA : D-5 before surgery without bridging and preoperative INR <1.5.  Exceptions requiring Heparin bridging for VKA interruption :   - Mechanical valve; - Stroke or veinous thromboembolism within the past 3 months; - Severe thrombophilia (Protein S, C or antithrombin III deficiency); - Left ventricular thrombus; - Atrial fibrillation with CHA₂DS₂-VASc score ≥7, embolic event within the past 3 months, or associated with mitral stenosis. |
| Heparin | LMWH prophylactic-dose : last injection at H-12;  LMWH therapeutic-dose : last injection at H-24.  UFH prophylactic-dose : stop at H-4;  UFH therapeutic-dose : last injection at H-12 (if subcutaneous) or stop at H-4 if intravenous. |
| Peroperative Heparin  management | UFH 300 UI/kg with a target ACT of 400–450 seconds before cannulation  *This target may be lowered to 350–400 seconds for CABG procedures.*  Antagonization with Protamine at a 0.6 :1 to 1 :1 ratio. |

**Table S1**: Perioperative management of blood thinning therapies

Abbreviation: ACT= Activated Clotting Time, Hb= Hemoglobin, IV= Intravenous, LMWH= Low Molecular Weight Heparin, NOAC = Non-vitamin K antagonist Oral Anticoagulant, UFH= Unfractionated Heparin, VKA = Vitamin K Antagonist

| Anemia correction according to the intervention – surgery delay | | |
| --- | --- | --- |
| 3 weeks or more | D-21: Day hospital   - Ferric carboxymaltose IV (Ferinject®): 1g if ≥ 50 kg, 500 mg if < 50 kg - Epoetin alfa SC (Binocrit®): 40,000 IU   D-14: Home nurse   - Epoetin alfa SC (Binocrit®): 40,000 IU   D-5: Follow up CBC  If Hb <13 g/dL, erythropoietin administration at hospital admission (D-1 or surgery day) | |
| Between 2 and 3 weeks | D-14: Day hospital   - Ferric carboxymaltose IV (Ferinject®): 1 g if ≥ 50kg, 500 mg if < 50 kg - Epoetin alfa SC (Binocrit®): 40,000 IU   D-7: Home nurse   - Epoetin alfa SC (Binocrit®): 40,000 IU   D-1: Follow up CBC  If Hb < 13 g/dL, erythropoietin administration at hospital admission (D-1 or surgery day) | |
| Between 1 and 2 weeks | D-7: Day hospital   - Ferric carboxymaltose IV (Ferinject®): 1g if ≥ 50kg, 500mg if < 50kg - Epoetin alfa SC (Binocrit®): 40,000 IU   Erythropoietin administration at hospital admission (D-1 or same day) | |
| Less than a week | Day hospital if possible, if not at hospital admission :   - Ferric carboxymaltose IV (Ferinject®): 1g if ≥ 50kg, 500mg if < 50kg - Epoetin alfa SC (Binocrit®): 40,000 IU | |
| Iron supplementation before and after surgery | | |
| Before surgery | | Ferric carboxymaltose IV (Ferinject®): 500mg if ferritin <100 µg/L or transferrin saturation coefficient <20% with Hb ≥13 g/dL |
| After surgery | | Ferric carboxymaltose IV (Ferinject®): 1000mg if Hb <12g/dL |

**Table S2**: Anemia correction and iron supplementation before and after surgery

Abbreviations: CBC= Complete blood count, EPO= Erythropoietin, Hb= Hemoglobin, IV= Intravenous, SC= Subcutaneous.

| General  characteristics | Age, sex, body mass index |
| --- | --- |
| Preoperative echocardiography | Left ventricular ejection fraction < 50%  Pulmonary hypertension  Right ventricular dysfunction  Left ventricular hypertrophy |
| Comorbidities | Coronary artery disease  Atrial fibrillation  Diabetes  Stroke  Chronic kidney disease (defined as creatinine clearance < 60 mL/min/1,73m2 using the CK-EPI formula) |
| Treatment | Dual antiplatelet inhibition  Vitamin K antagonist  Direct oral anticoagulant |
| Laboratory data | Preoperative hemoglobin (g/dL)  Hemoglobin after iron and erythropoietin injection (g/dL)  Ferritin (µg/L) and transferrin saturation (%)  Lactate on ICU admission (mmol/L)  Postoperative serum creatinine peak (µmol/L)  Postoperative high-sensitivity troponin peak (µg/L)  Hemoglobin evolution (g/dL) |
| Surgical data | Type of surgery  Cardiopulmonary bypass duration  Norepinephrine administration and dose (µg/kg/min)  Dobutamine administration  Postoperative cardiac or respiratory support  Fuid management during cardiopulmonary and first postoperative day  Intraoperative administration of fibrinogen concentrates and prothrombin complex concentrates |

**Table S3**: Data collected for each patient through electronic health record system

**Figure S1**: Distribution of the number of RBC units transfused until hospital discharge between PBM groups

Abbreviations: PBM= Patient blood management, RBC= Red blood cells.


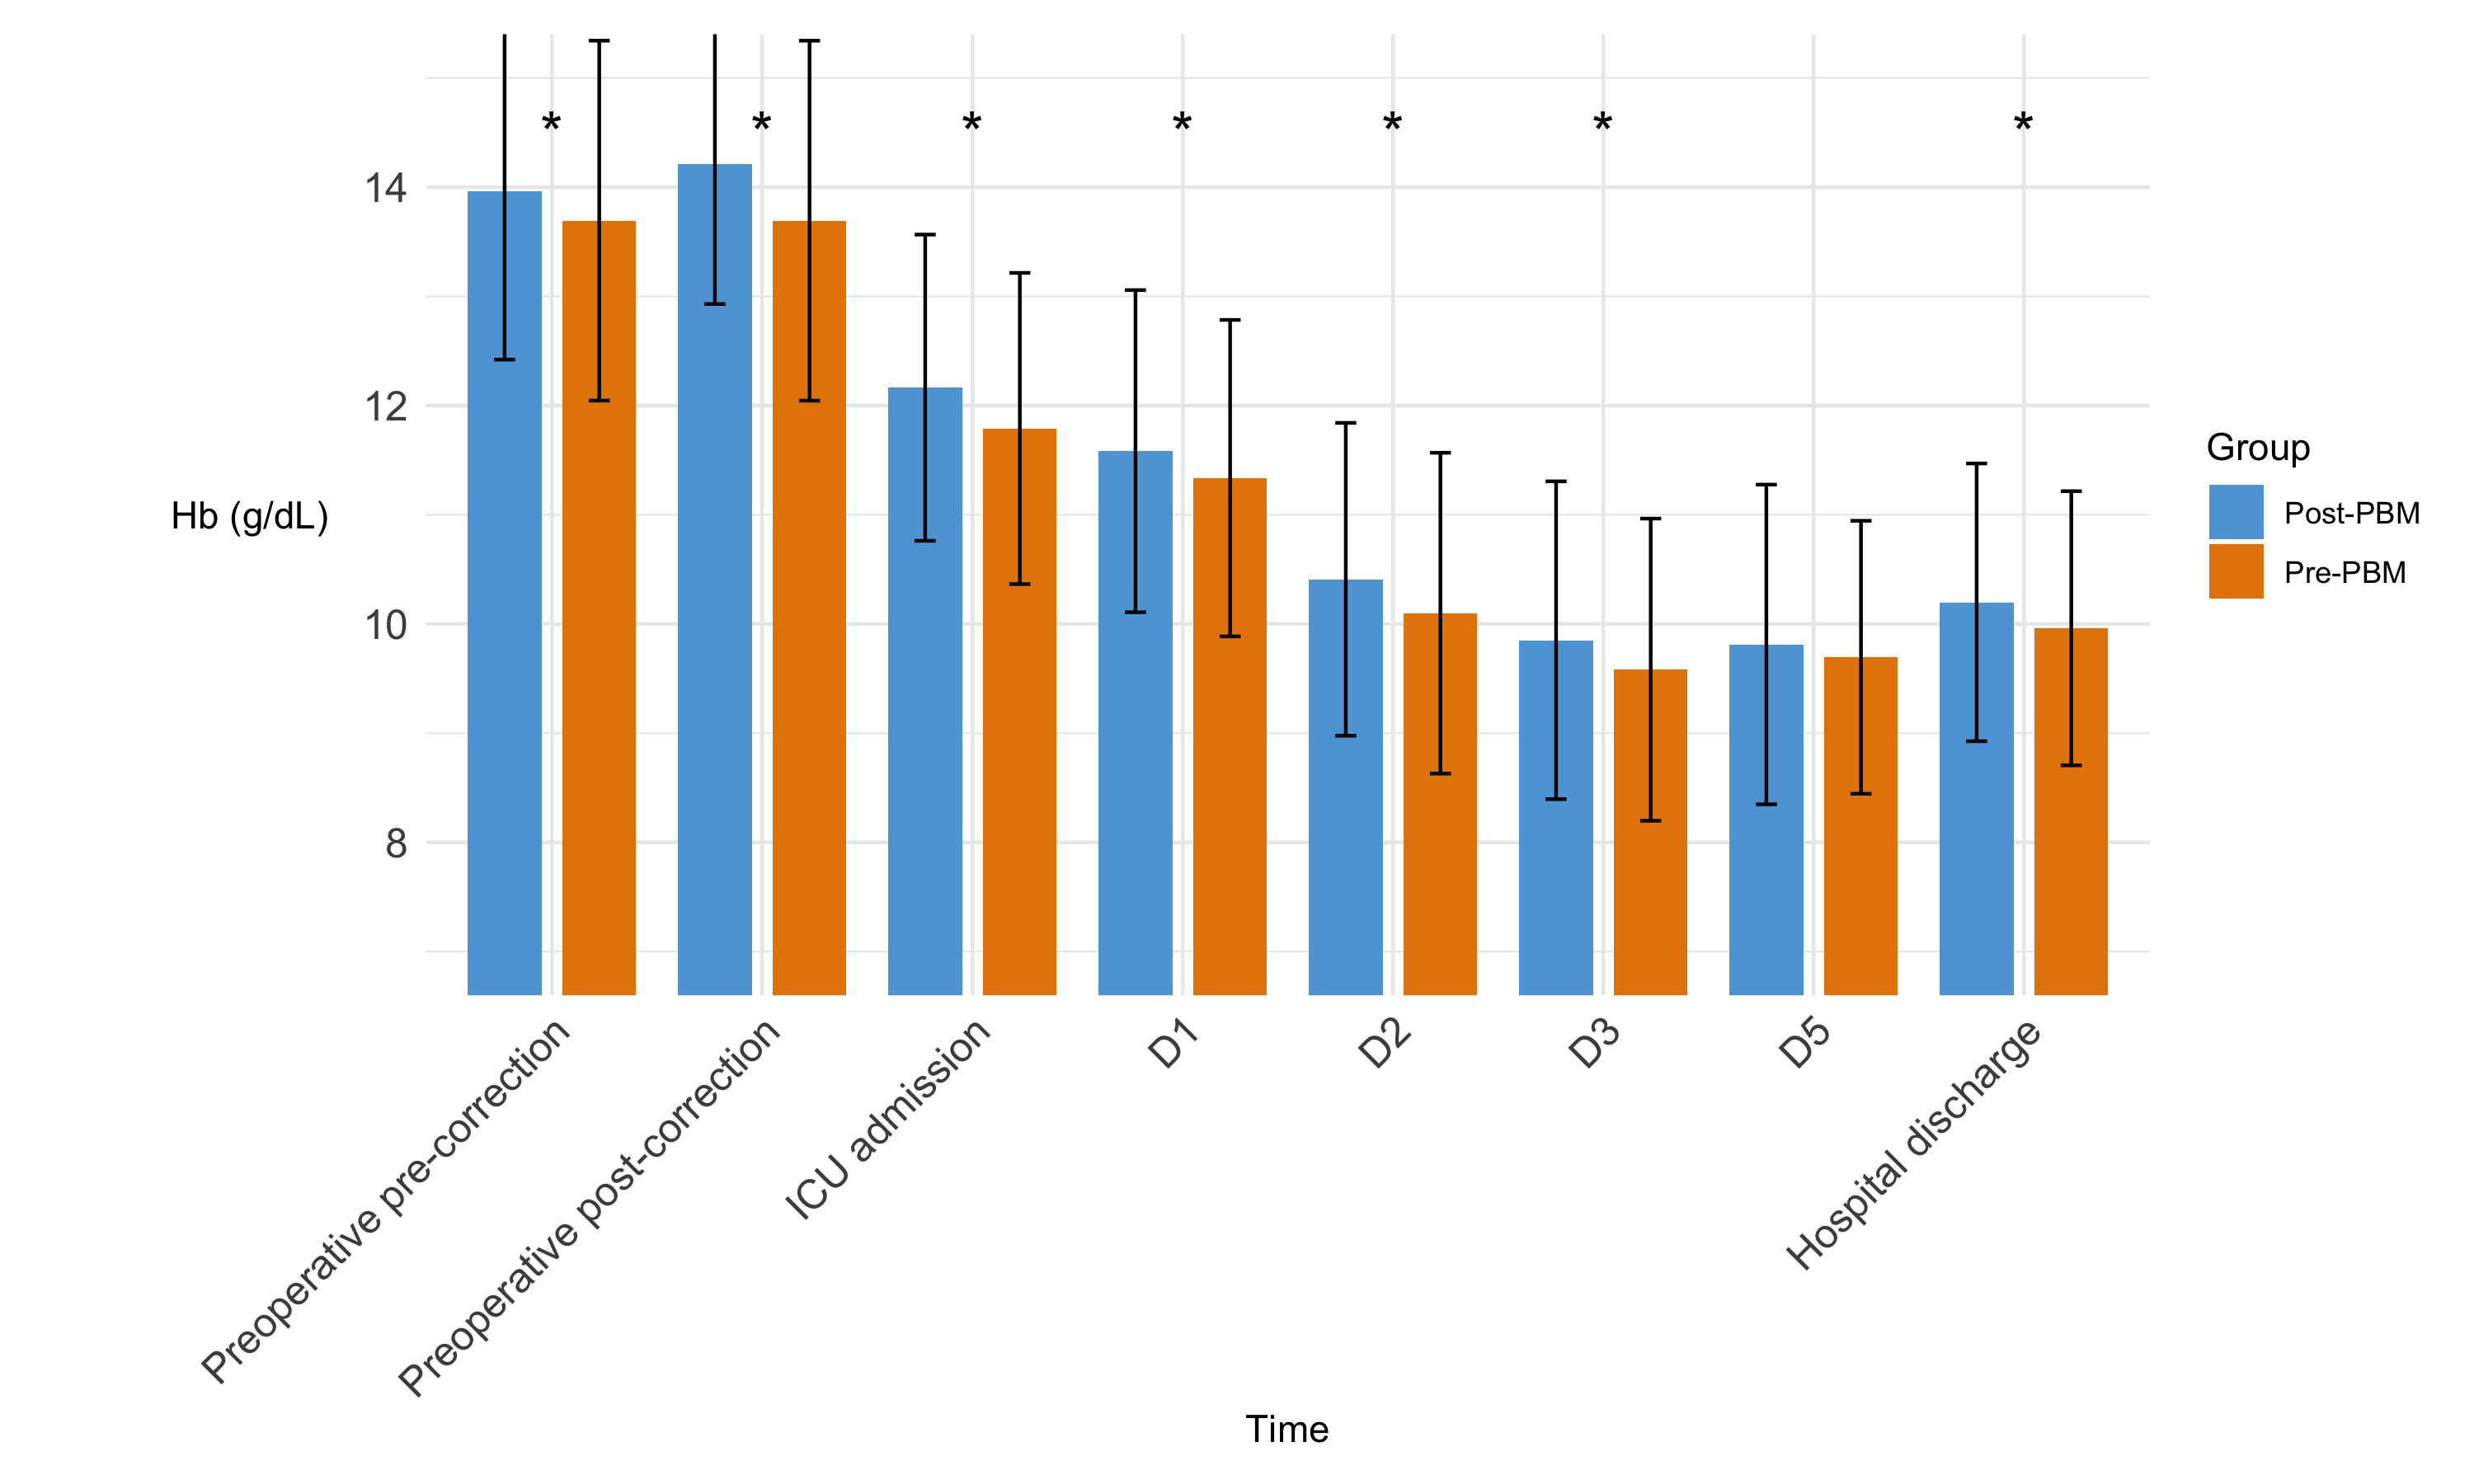


**Figure S2**: Hemoglobin evolution

Abbreviations: D= Day, ICU= Intensive care unit, PBM= Patient blood management.


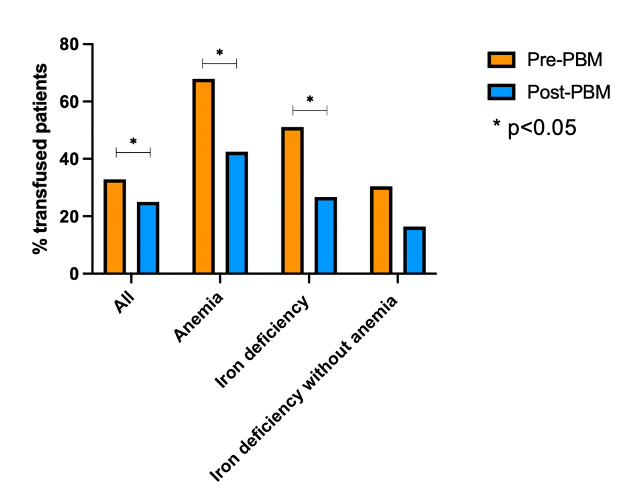


**Figure S3**: RBC transfusion in the subpopulation groups of preoperative anemia

Abbreviations: PBM= Patient blood management.


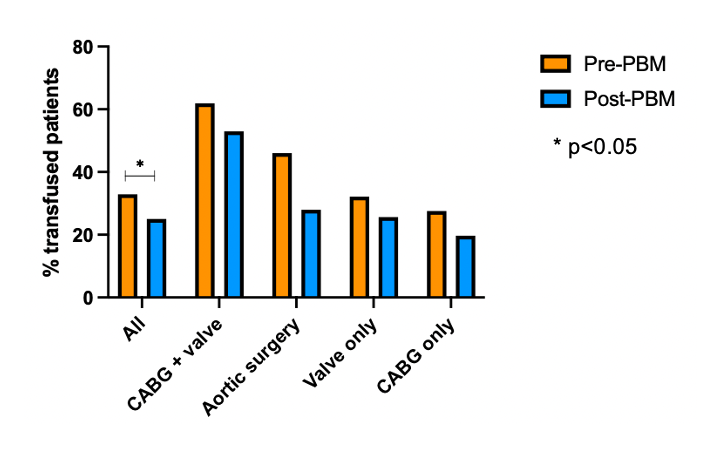


**Figure S4**: RBC transfusion depending on type of surgery

Abbreviations: CABG= Coronary artery bypass grafting, PBM= Patient blood management.
